# Supplementary material for: HER3 targeting with an antibody‐drug conjugate bypasses resistance to anti‐HER2 therapies
Source: PubMed Central journal article supplement (PMC7207167; doi:10.15252/emmm.201911498), 2020-04-24
Supplement: EMMM-12-e11498-s001.pdf [file EMMM-12-e11498-s001.pdf]

# **HER3 targeting with an Antibody-Drug Conjugate Bypasses Resistance to anti-HER2 therapies**

**Lucía Gandullo-Sánchez, Emily Capone, Alberto Ocaña, Stefano Iacobelli,  
Gianluca Sala and Atanasio Pandiella**

## **APPENDIX**

Appendix Table S1, page 2

Appendix Table S2, page 3

Appendix Table S3, page 3

Appendix Table S4, page 4

Appendix Table S5, page 5

Appendix Table S6, page 5

Appendix Table S7, page 5

Appendix Table S8, page 6

Appendix Table S9, page 6

Appendix Table S10, page 7

Appendix Table S11, page 8

Appendix Table S12, page 9

**Appendix Table S1. Antibodies used.**

| <b>Antibody target</b>     | <b>Application, dilution/amount</b> | <b>Catalog number</b> | <b>Source</b>           |
|----------------------------|-------------------------------------|-----------------------|-------------------------|
| p-Tyr (PY99)               | Western, 1:10,000                   | sc-7020               | Santa Cruz Biotechnol.  |
| GAPDH                      | Western, 1:10,000                   | sc-166574             | Santa Cruz Biotechnol.  |
| Cleaved caspase 3          | Western, 1:1,000                    | #9664                 | Cell Signaling Technol. |
| pHER2 (Tyr1221/22)         | Western, 1:1,000                    | #2249                 | Cell Signaling Technol. |
| pHER3 (Tyr1289)            | Western, 1:5,000                    | #4791                 | Cell Signaling Technol. |
| pHistone H3 (Ser10)        | Western, 1:6,000                    | 06-570                | Merck                   |
| HER2 (Ab3)                 | Western, 1:10,000                   | OP15                  | Calbiochem              |
| Calnexin                   | Western, 1:40,000                   | ADI-SPA-860-F         | Enzo Life Science       |
| BubR1                      | Western, 1:3,500                    | 612503                | BD Biosciences          |
| pAKT (pS473)               | Western, 1:5,000                    | 560397                | BD Biosciences          |
| HER3                       | Western, 1:5,000                    | Made in house         | Sanchez-Martin, 2012    |
| Rabbit Ig (HRP)            | Western, 1:20,000                   | 1706515               | Bio Rad Laboratories    |
| Mouse Ig (Starbright 520)  | Western, 1:5,000                    | 12005867              | Bio Rad Laboratories    |
| Rabbit Ig (Starbright 700) | Western, 1:5,000                    | 12004162              | Bio Rad Laboratories    |
| Human Ig (HRP)             | Western, 1:40,000                   | 109-035-088           | Jackson Immunores.      |
| Mouse Ig (HRP)             | Western, 1:10,000                   | NA931                 | GE Healthcare           |
| $\beta$ -tubulin           | Immunofluorescence, 1:200           | T4026                 | Sigma-Aldrich           |
| LAMP1                      | Immunofluorescence, 1:100           | #9091                 | Cell Signaling Technol. |
| Rabbit Ig (Cy2)            | Immunofluorescence, 1:100           | 111-225-144           | Jackson Immunores.      |
| Human Ig (Cy3)             | Immunofluorescence, 1:800           | 109-165-003           | Jackson Immunores.      |
| Mouse Ig (Cy2)             | Immunofluorescence, 1:100           | PA42002               | GE Healthcare           |
| HER3                       | Immunoprecipitation, 1 $\mu$ g      | Made in house         | Sanchez-Martin, 2012    |
| HER2                       | Immunoprecipitation, 1 $\mu$ g      | Trastuzumab           | Roche                   |

**Appendix Table S2.** List of exact *P* values for data presented in Figure 1B.

| Figure | Group                                                    | Statistical analysis                               | <i>P</i> -value        |
|--------|----------------------------------------------------------|----------------------------------------------------|------------------------|
| Fig 1B | Control vs trastuzumab treatment in BT474                | Two-way factorial ANOVA with Bonferroni correction | 5.667x10 <sup>-8</sup> |
| Fig 1B | Control vs trastuzumab treatment in BTRH                 | Two-way factorial ANOVA with Bonferroni correction | 0.022                  |
| Fig 1B | Control vs trastuzumab treatment in BTRH#10              | Two-way factorial ANOVA with Bonferroni correction | 0.163                  |
| Fig 1B | Between all controls                                     | Two-way factorial ANOVA with Bonferroni correction | 1                      |
| Fig 1B | Trastuzumab treatment in BT474 vs trastuzumab in BTRH    | Two-way factorial ANOVA with Bonferroni correction | 0.000003               |
| Fig 1B | Trastuzumab treatment in BT474 vs trastuzumab in BTRH#10 | Two-way factorial ANOVA with Bonferroni correction | 7.439x10 <sup>-7</sup> |
| Fig 1B | Trastuzumab treatment in BTRH vs trastuzumab in BTRH#10  | Two-way factorial ANOVA with Bonferroni correction | 0.819                  |

**Appendix Table S3.** List of exact *P* values for data presented in Figure 1F.

| Figure | Group                           | Statistical analysis                               | <i>P</i> -value        |
|--------|---------------------------------|----------------------------------------------------|------------------------|
| Fig 1F | Control vs EV20 in BT474        | One-way ANOVA followed by Bonferroni post-hoc test | 1                      |
| Fig 1F | Control vs EV20/MMAF in BT474   | One-way ANOVA followed by Bonferroni post-hoc test | 7.438x10 <sup>-7</sup> |
| Fig 1F | EV20 vs EV20/MMAF in BT474      | One-way ANOVA followed by Bonferroni post-hoc test | 7.737x10 <sup>-7</sup> |
| Fig 1F | Control vs EV20 in BTRH         | One-way ANOVA followed by Bonferroni post-hoc test | 0.290307               |
| Fig 1F | Control vs EV20/MMAF in BTRH    | One-way ANOVA followed by Bonferroni post-hoc test | 3.137x10 <sup>-8</sup> |
| Fig 1F | EV20 vs EV20/MMAF in BTRH       | One-way ANOVA followed by Bonferroni post-hoc test | 4.149x10 <sup>-8</sup> |
| Fig 1F | Control vs EV20 in BTRH#10      | One-way ANOVA followed by Bonferroni post-hoc test | 1                      |
| Fig 1F | Control vs EV20/MMAF in BTRH#10 | One-way ANOVA followed by Bonferroni post-hoc test | 0.000002               |
| Fig 1F | EV20 vs EV20/MMAF in BTRH#10    | One-way ANOVA followed by Bonferroni post-hoc test | 0.000002               |

**Appendix Table S4.** List of exact *P* values for data presented in Figure 2A.

| Figure | Group                                                   | Statistical analysis                               | <i>P</i> -value         |
|--------|---------------------------------------------------------|----------------------------------------------------|-------------------------|
| Fig 2A | Control vs trastuzumab treatment in BT474               | Two-way factorial ANOVA with Bonferroni correction | 1.003x10 <sup>-13</sup> |
| Fig 2A | Control vs trastuzumab treatment in BTRH                | Two-way factorial ANOVA with Bonferroni correction | 0.001375                |
| Fig 2A | Control vs trastuzumab treatment in PDX118              | Two-way factorial ANOVA with Bonferroni correction | 3.519x10 <sup>-16</sup> |
| Fig 2A | Control vs trastuzumab treatment in TR1                 | Two-way factorial ANOVA with Bonferroni correction | 5.716x10 <sup>-9</sup>  |
| Fig 2A | Control vs trastuzumab treatment in TR2                 | Two-way factorial ANOVA with Bonferroni correction | 1.712x10 <sup>-9</sup>  |
| Fig 2A | Between all controls                                    | Two-way factorial ANOVA with Bonferroni correction | 1                       |
| Fig 2A | Trastuzumab treatment in BT474 vs trastuzumab in BTRH   | Two-way factorial ANOVA with Bonferroni correction | 7.775x10 <sup>-11</sup> |
| Fig 2A | Trastuzumab treatment in BT474 vs trastuzumab in PDX118 | Two-way factorial ANOVA with Bonferroni correction | 0.000056                |
| Fig 2A | Trastuzumab treatment in BT474 vs trastuzumab in TR1    | Two-way factorial ANOVA with Bonferroni correction | 9.050x10 <sup>-7</sup>  |
| Fig 2A | Trastuzumab treatment in BT474 vs trastuzumab in TR2    | Two-way factorial ANOVA with Bonferroni correction | 0.000004                |
| Fig 2A | Trastuzumab treatment in BTRH vs trastuzumab in PDX     | Two-way factorial ANOVA with Bonferroni correction | 9.058x10 <sup>-14</sup> |
| Fig 2A | Trastuzumab treatment in BTRH vs trastuzumab in TR1     | Two-way factorial ANOVA with Bonferroni correction | 0.000083                |
| Fig 2A | Trastuzumab treatment in BTRH vs trastuzumab in TR2     | Two-way factorial ANOVA with Bonferroni correction | 0.000018                |
| Fig 2A | Trastuzumab treatment in PDX118 vs trastuzumab in TR1   | Two-way factorial ANOVA with Bonferroni correction | 6.209x10 <sup>-11</sup> |
| Fig 2A | Trastuzumab treatment in PDX118 vs trastuzumab in TR2   | Two-way factorial ANOVA with Bonferroni correction | 1.590x10 <sup>-10</sup> |
| Fig 2A | Trastuzumab treatment in TR1 vs trastuzumab in TR2      | Two-way factorial ANOVA with Bonferroni correction | 1                       |

**Appendix Table S5.** List of exact *P* values for data presented in Figure 2H.

| Figure | Group                | Statistical analysis                               | <i>P</i> -value        |
|--------|----------------------|----------------------------------------------------|------------------------|
| Fig 2H | ShC vs shHER3#1      | One-way ANOVA followed by Bonferroni post-hoc test | 0.000004               |
| Fig 2H | shC vs shHER3#2      | One-way ANOVA followed by Bonferroni post-hoc test | 4.286x10 <sup>-7</sup> |
| Fig 2H | ShHER3#1 vs shHER3#2 | One-way ANOVA followed by Bonferroni post-hoc test | 0.0005                 |

**Appendix Table S6.** List of exact *P* values for data presented in Figure 4D.

| Figure | Group                         | Statistical analysis | <i>P</i> -value |
|--------|-------------------------------|----------------------|-----------------|
| Fig 4D | Control vs 48h EMMAF in BT474 | Welch's t-test       | 0.002           |
| Fig 4D | Control vs 48h EMMAF in BTRH  | Welch's t-test       | 0.005           |

**Appendix Table S7.** List of exact *P* values for data\* presented in Figure 5A.

| Figure | Group                                         | Statistical analysis                                                       | <i>P</i> -value |
|--------|-----------------------------------------------|----------------------------------------------------------------------------|-----------------|
| Fig 5A | Control vs EV20/MMAF (3.3 mg/kg)              | One-way ANOVA with Welch correction followed by Games-Howell post-hoc test | 0.039           |
| Fig 5A | Control vs EV20/MMAF (10 mg/kg)               | One-way ANOVA with Welch correction followed by Games-Howell post-hoc test | 0.034           |
| Fig 5A | Control vs EV20                               | One-way ANOVA with Welch correction followed by Games-Howell post-hoc test | 1               |
| Fig 5A | EV20 vs EV20/MMAF (3.3 mg/kg)                 | One-way ANOVA with Welch correction followed by Games-Howell post-hoc test | 0.010           |
| Fig 5A | EV20 vs EV20/MMAF (10 mg/kg)                  | One-way ANOVA with Welch correction followed by Games-Howell post-hoc test | 0.008           |
| Fig 5A | EV20/MMAF (3.3 mg/kg) vs EV20/MMAF (10 mg/kg) | One-way ANOVA with Welch correction followed by Games-Howell post-hoc test | 0.482           |

\*The statistical analysis presented in this table was done for the last measured points.

**Appendix Table S8.** List of exact *P* values for data\* presented in Figure 5B.

| Figure | Group                    | Statistical analysis                               | <i>P</i> -value        |
|--------|--------------------------|----------------------------------------------------|------------------------|
| Fig 5B | Control vs trastuzumab   | One-way ANOVA followed by Bonferroni post-hoc test | 1                      |
| Fig 5B | Control vs EV20/MMAF     | One-way ANOVA followed by Bonferroni post-hoc test | 0.000003               |
| Fig 5B | Control vs EV20          | One-way ANOVA followed by Bonferroni post-hoc test | 0.272                  |
| Fig 5B | EV20 vs EV20/MMAF        | One-way ANOVA followed by Bonferroni post-hoc test | 6.817x10 <sup>-7</sup> |
| Fig 5B | EV20 vs trastuzumab      | One-way ANOVA followed by Bonferroni post-hoc test | 1                      |
| Fig 5B | Trastuzumab vs EV20/MMAF | One-way ANOVA followed by Bonferroni post-hoc test | 3.451x10 <sup>-7</sup> |

\*The statistical analysis presented in this table was done for the last measured points.

**Appendix Table S9.** List of exact *P* values for data\* presented in Figure 5C.

| Figure | Group                    | Statistical analysis                               | <i>P</i> -value |
|--------|--------------------------|----------------------------------------------------|-----------------|
| Fig 5C | Control vs trastuzumab   | One-way ANOVA followed by Bonferroni post-hoc test | 1               |
| Fig 5C | Control vs EV20/MMAF     | One-way ANOVA followed by Bonferroni post-hoc test | 0.000007        |
| Fig 5C | Control vs EV20          | One-way ANOVA followed by Bonferroni post-hoc test | 0.018           |
| Fig 5C | EV20 vs EV20/MMAF        | One-way ANOVA followed by Bonferroni post-hoc test | 0.003           |
| Fig 5C | EV20 vs trastuzumab      | One-way ANOVA followed by Bonferroni post-hoc test | 0.010           |
| Fig 5C | Trastuzumab vs EV20/MMAF | One-way ANOVA followed by Bonferroni post-hoc test | 0.000005        |

\*The statistical analysis presented in this table was done for the last measured points.

**Appendix Table S10.** List of exact *P* values for data presented in Figure EV1E.

| Figure   | Group                              | Statistical analysis                               | <i>P</i> -value        |
|----------|------------------------------------|----------------------------------------------------|------------------------|
| Fig EV1E | Control vs EV20 in SKBR3           | One-way ANOVA followed by Bonferroni post-hoc test | 0.007259               |
| Fig EV1E | Control vs EV20/MMAF in SKBR3      | One-way ANOVA followed by Bonferroni post-hoc test | 6.573x10 <sup>-7</sup> |
| Fig EV1E | EV20 vs EV20/MMAF in SKBR3         | One-way ANOVA followed by Bonferroni post-hoc test | 0.000002               |
| Fig EV1E | Control vs EV20 in BT474           | One-way ANOVA followed by Bonferroni post-hoc test | 1                      |
| Fig EV1E | Control vs EV20/MMAF in BT474      | One-way ANOVA followed by Bonferroni post-hoc test | 0.000004               |
| Fig EV1E | EV20 vs EV20/MMAF in BT474         | One-way ANOVA followed by Bonferroni post-hoc test | 0.000644               |
| Fig EV1E | Control vs EV20 in BTRH            | One-way ANOVA followed by Bonferroni post-hoc test | 1                      |
| Fig EV1E | Control vs EV20/MMAF in BTRH       | One-way ANOVA followed by Bonferroni post-hoc test | 0.000003               |
| Fig EV1E | EV20 vs EV20/MMAF in BTRH          | One-way ANOVA followed by Bonferroni post-hoc test | 0.000002               |
| Fig EV1E | Control vs EV20 in MDA-MB-361      | One-way ANOVA followed by Bonferroni post-hoc test | 0.949374               |
| Fig EV1E | Control vs EV20/MMAF in MDA-MB-361 | One-way ANOVA followed by Bonferroni post-hoc test | 2.091x10 <sup>-7</sup> |
| Fig EV1E | EV20 vs EV20/MMAF in MDA-MB-361    | One-way ANOVA followed by Bonferroni post-hoc test | 2.583x10 <sup>-7</sup> |
| Fig EV1E | Control vs EV20 in HCC1419         | One-way ANOVA followed by Bonferroni post-hoc test | 1                      |
| Fig EV1E | Control vs EV20/MMAF in HCC1419    | One-way ANOVA followed by Bonferroni post-hoc test | 8.561x10 <sup>-7</sup> |
| Fig EV1E | EV20 vs EV20/MMAF in HCC1419       | One-way ANOVA followed by Bonferroni post-hoc test | 0.000001               |
| Fig EV1E | Control vs EV20 in HCC1569         | One-way ANOVA followed by Bonferroni post-hoc test | 0.04982                |
| Fig EV1E | Control vs EV20/MMAF in HCC1569    | One-way ANOVA followed by Bonferroni post-hoc test | 4.234x10 <sup>-7</sup> |
| Fig EV1E | EV20 vs EV20/MMAF in HCC1569       | One-way ANOVA followed by Bonferroni post-hoc test | 8.947x10 <sup>-7</sup> |
| Fig EV1E | Control vs EV20 in HCC1954         | One-way ANOVA followed by Bonferroni post-hoc test | 1                      |
| Fig EV1E | Control vs EV20/MMAF in HCC1954    | One-way ANOVA followed by Bonferroni post-hoc test | 9.293x10 <sup>-7</sup> |
| Fig EV1E | EV20 vs EV20/MMAF in HCC1954       | One-way ANOVA followed by Bonferroni post-hoc test | 9.100x10 <sup>-7</sup> |

**Appendix Table S11.** List of exact *P* values for data presented in Figure EV1H.

| <b>Figure</b> | <b>Group</b>                        | <b>Statistical analysis</b>                                                | <b><i>P</i>-value</b> |
|---------------|-------------------------------------|----------------------------------------------------------------------------|-----------------------|
| Fig EV1H      | Control vs EV20/MMAF in BT474       | One-way ANOVA with Welch correction followed by Games-Howell post-hoc test | 0.015                 |
| Fig EV1H      | Control vs NRG in BT474             | One-way ANOVA with Welch correction followed by Games-Howell post-hoc test | 0.648                 |
| Fig EV1H      | Control vs NRG+EV20/MMAF in BT474   | One-way ANOVA with Welch correction followed by Games-Howell post-hoc test | 0.018                 |
| Fig EV1H      | NRG vs EV20/MMAF in BT474           | One-way ANOVA with Welch correction followed by Games-Howell post-hoc test | 0.010                 |
| Fig EV1H      | NRG vs NRG+EV20/MMAF in BT474       | One-way ANOVA with Welch correction followed by Games-Howell post-hoc test | 0.011                 |
| Fig EV1H      | NRG+EV20/MMAF vs EV20/MMAF in BT474 | One-way ANOVA with Welch correction followed by Games-Howell post-hoc test | 0.016                 |
| Fig EV1H      | Control vs EV20/MMAF in BTRH        | One-way ANOVA with Welch correction followed by Games-Howell post-hoc test | 0.004                 |
| Fig EV1H      | Control vs NRG in BTRH              | One-way ANOVA with Welch correction followed by Games-Howell post-hoc test | 0.499                 |
| Fig EV1H      | Control vs NRG+EV20/MMAF in BTRH    | One-way ANOVA with Welch correction followed by Games-Howell post-hoc test | 0.002                 |
| Fig EV1H      | NRG vs EV20/MMAF in BTRH            | One-way ANOVA with Welch correction followed by Games-Howell post-hoc test | 0.009                 |
| Fig EV1H      | NRG vs NRG+EV20/MMAF in BTRH        | One-way ANOVA with Welch correction followed by Games-Howell post-hoc test | 0.009                 |
| Fig EV1H      | NRG+EV20/MMAF vs EV20/MMAF in BTRH  | One-way ANOVA with Welch correction followed by Games-Howell post-hoc test | 0.026                 |



**Appendix Table S12.** List of exact *P* values for data\* presented in Figure EV5D.

| <b>Figure</b> | <b>Group</b>         | <b>Statistical analysis</b>                                                | <b><i>P</i>-value</b> |
|---------------|----------------------|----------------------------------------------------------------------------|-----------------------|
| Fig EV5D      | Control vs TDM1      | One-way ANOVA with Welch correction followed by Games-Howell post-hoc test | 0.114                 |
| Fig EV5D      | Control vs EV20/MMAF | One-way ANOVA with Welch correction followed by Games-Howell post-hoc test | 0.009                 |
| Fig EV5D      | Control vs EV20      | One-way ANOVA with Welch correction followed by Games-Howell post-hoc test | 0.995                 |
| Fig EV5D      | EV20 vs EV20/MMAF    | One-way ANOVA with Welch correction followed by Games-Howell post-hoc test | 0.000011              |
| Fig EV5D      | EV20 vs TDM1         | One-way ANOVA with Welch correction followed by Games-Howell post-hoc test | 0.077                 |
| Fig EV5D      | TDM1 vs EV20/MMAF    | One-way ANOVA with Welch correction followed by Games-Howell post-hoc test | 0.011                 |

\*The statistical analysis presented in this table was done for the last measured points.
