# Supplementary material for: HER3 targeting with an antibody‐drug conjugate bypasses resistance to anti‐HER2 therapies
Source: PubMed Central journal article supplement (PMC7207167; doi:10.15252/emmm.201911498), 2020-04-24

Figure 2B

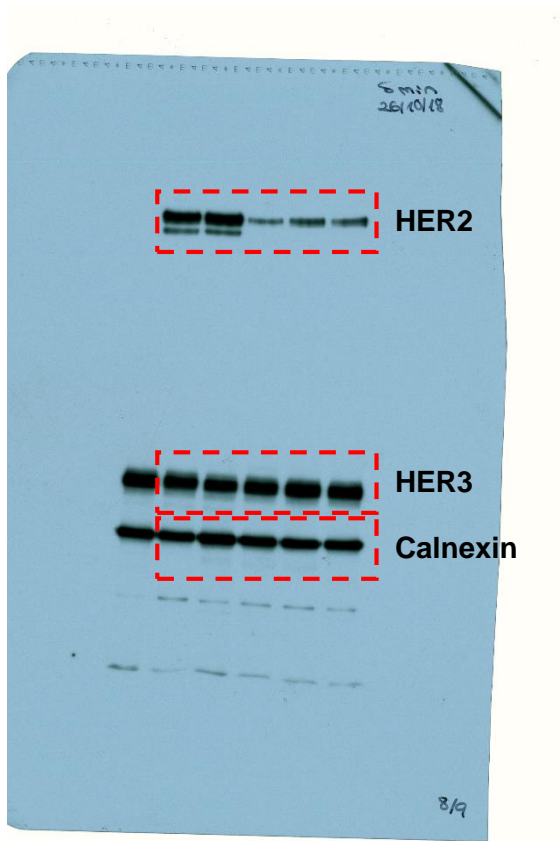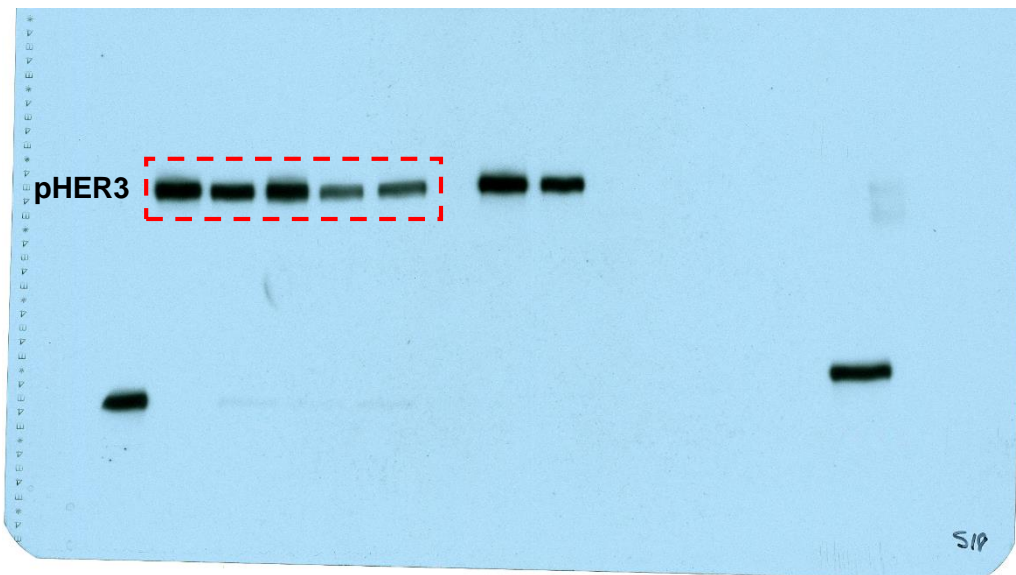

Figure 2E

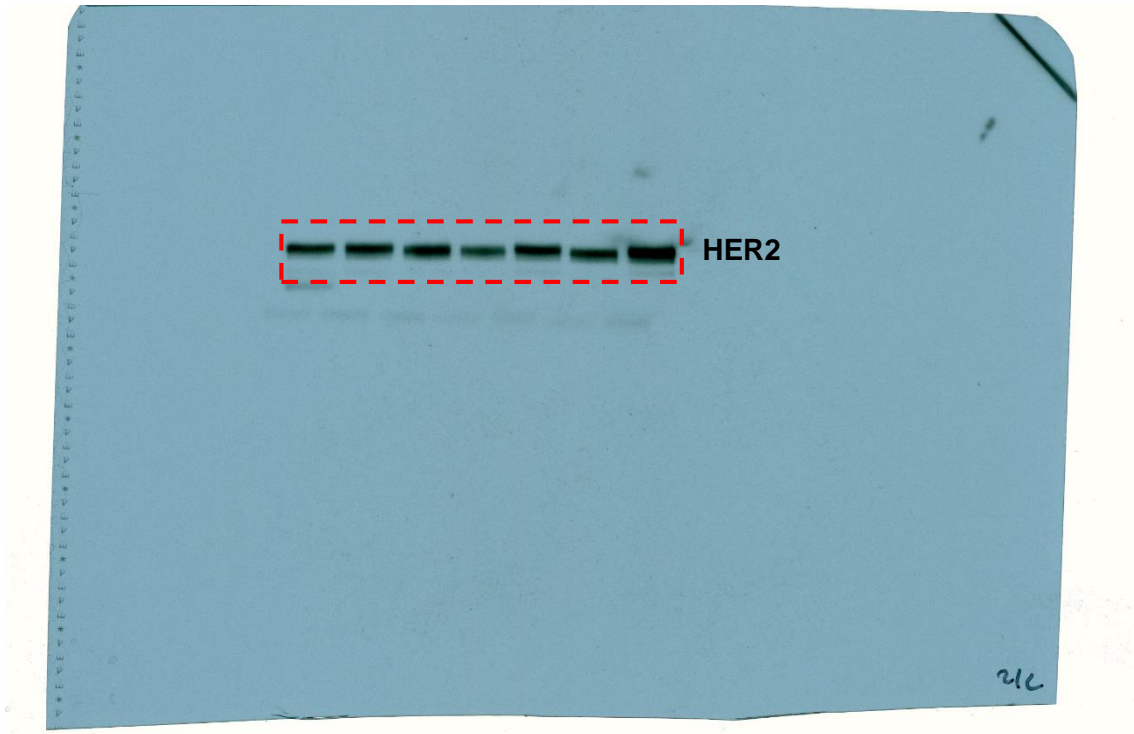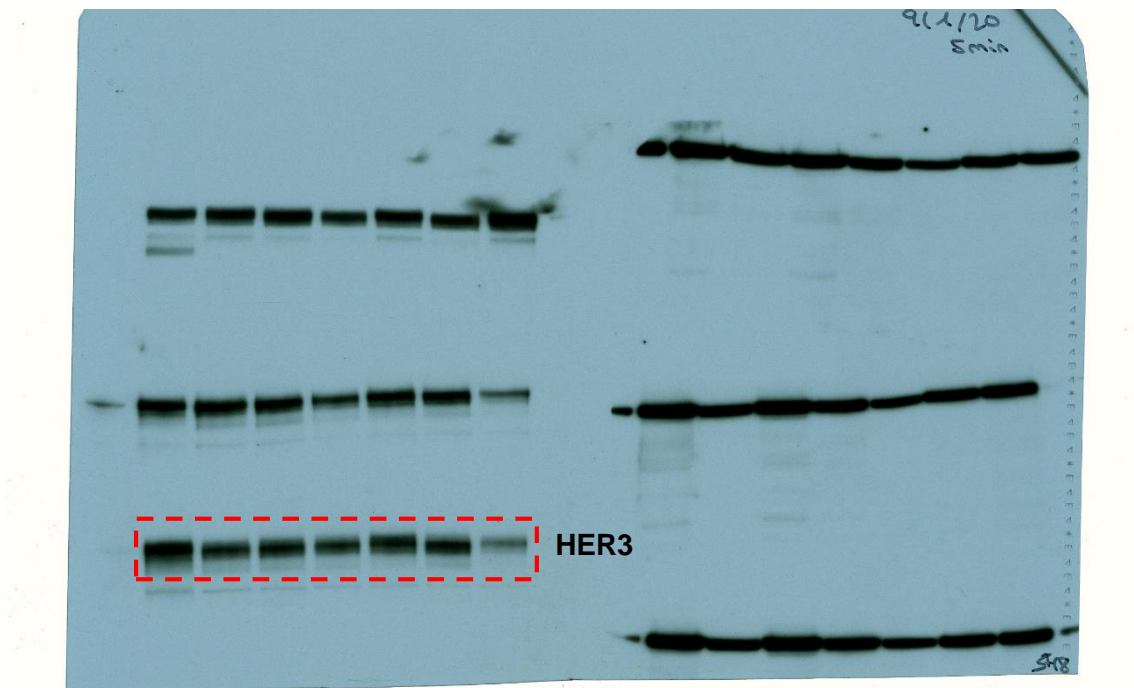

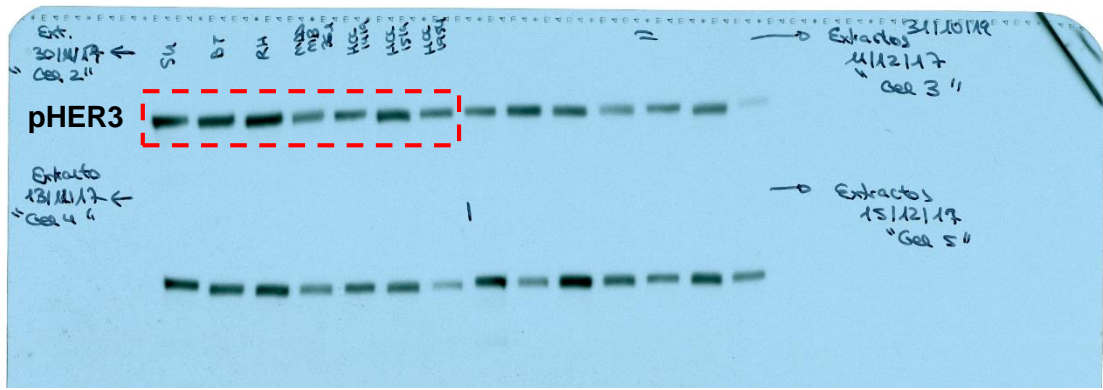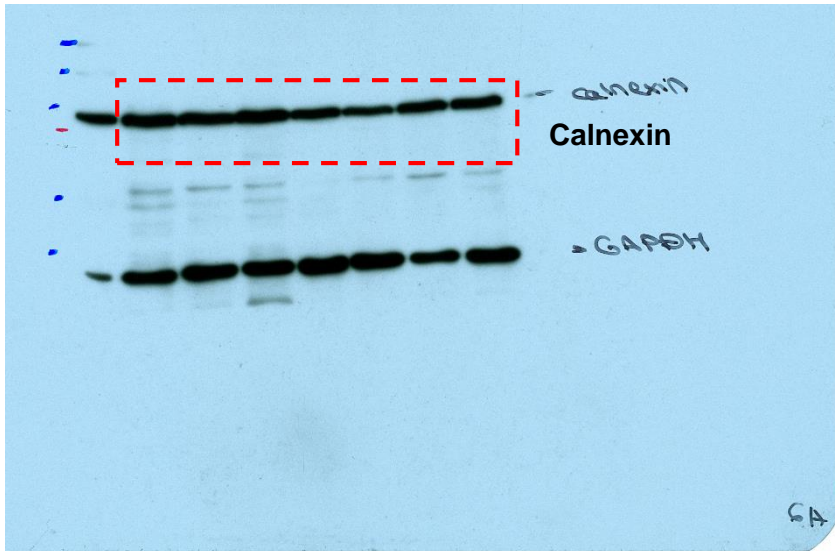

Figure 2G

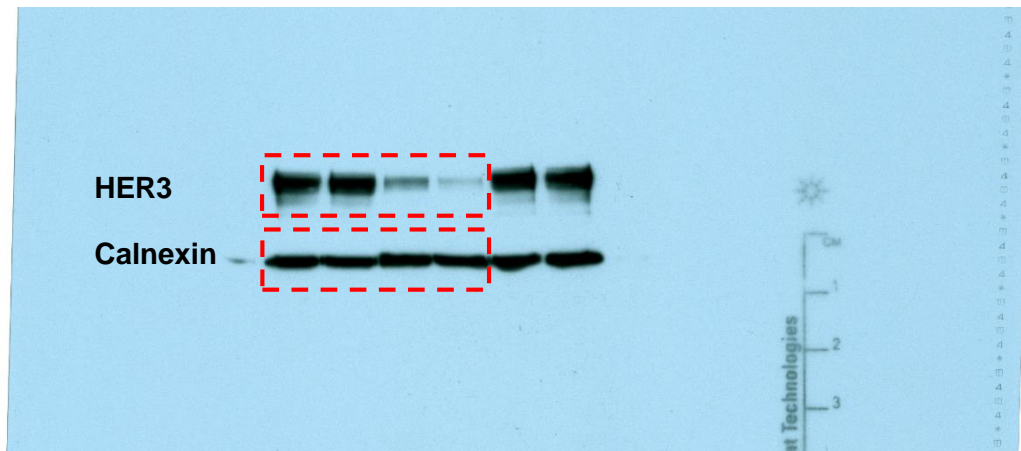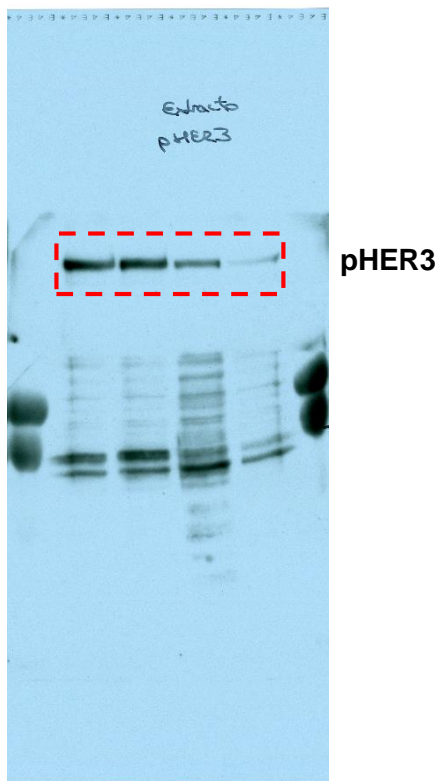

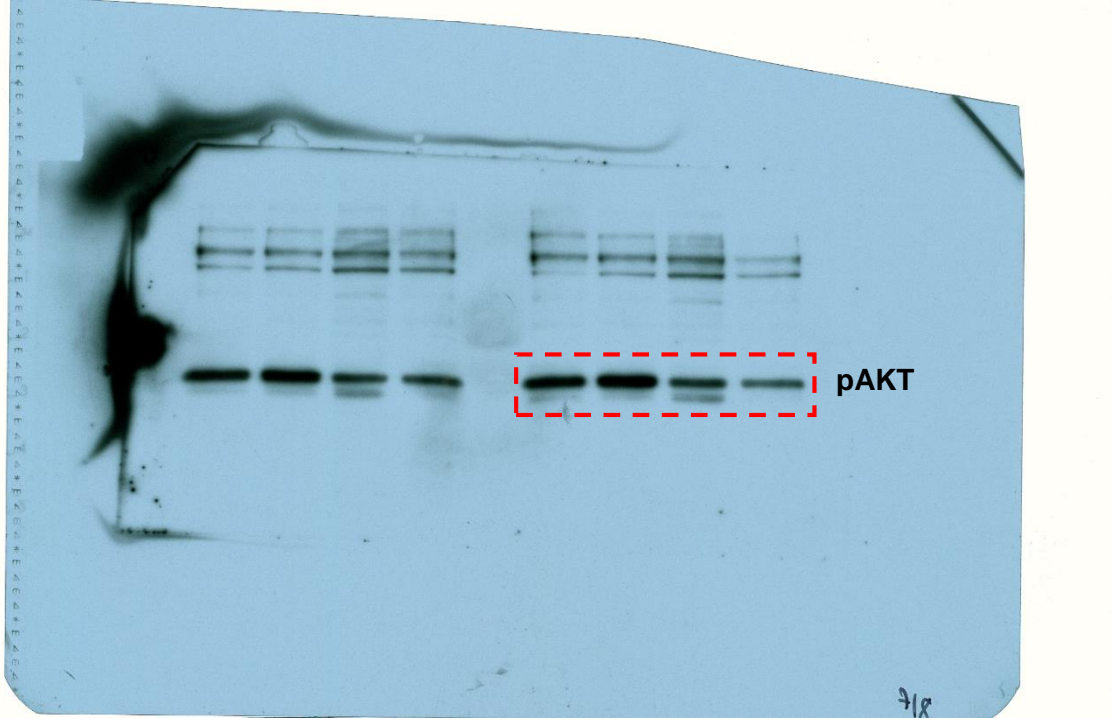

Supplement: EMMM-12-e11498-s005.pdf [file EMMM-12-e11498-s005.pdf]
