# Supplementary material for: HER3 targeting with an antibody‐drug conjugate bypasses resistance to anti‐HER2 therapies
Source: PubMed Central journal article supplement (PMC7207167; doi:10.15252/emmm.201911498), 2020-04-24
Supplement: EMMM-12-e11498-s006.pdf [file EMMM-12-e11498-s006.pdf]

Figure 3B

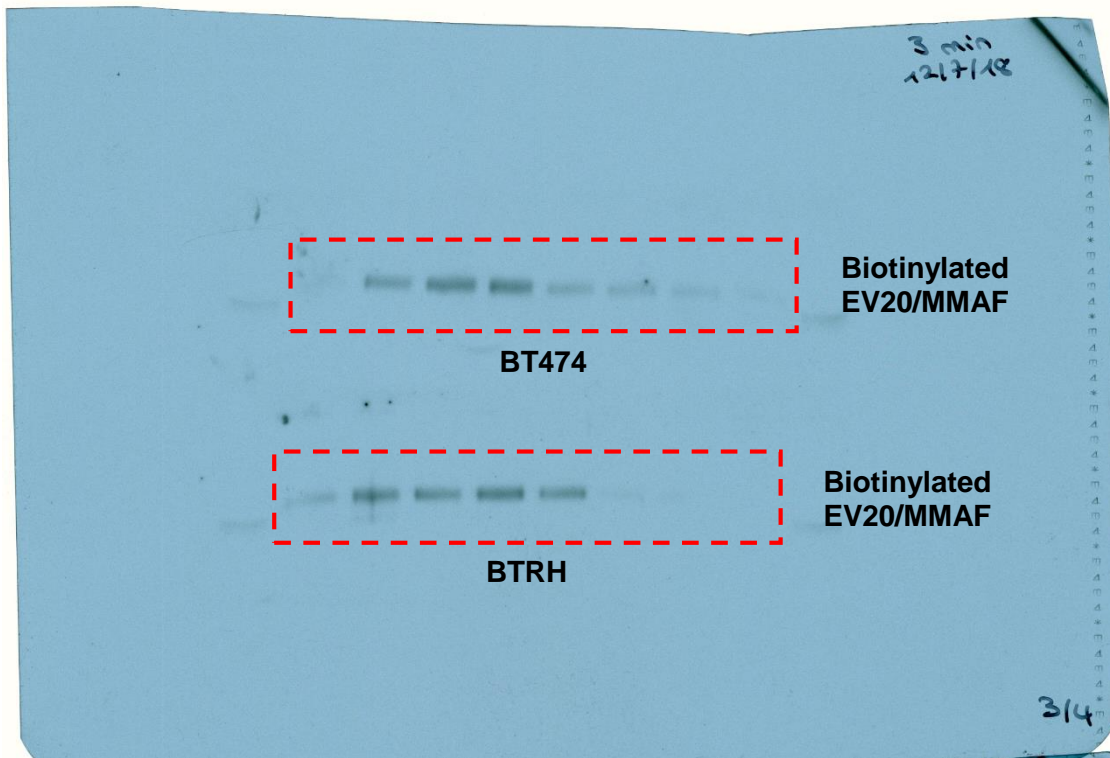

131718

C 15' 30' 1h 3h 6h 9h 24h

Calnexina

1. Bacterias BSA.
2. Acido clorídrico 1:10.000 (pH 4.08)
3. De 20 µl de extracto 5 µl 1:10.000

80 kDa

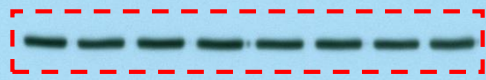

BT474

BT

Calnexin

GAPDH

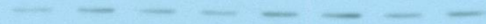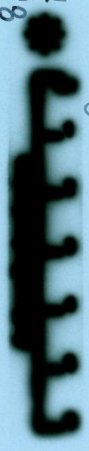

Calnexin

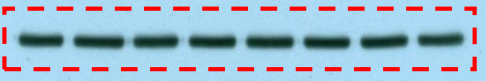

BTRH

RH

Calnexin

GAPDH

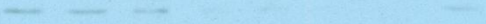

- Cel 8% , 14 pelillos
- Tto 1h a 40C con EUCALMATAF 10mM ba tñilado.
- 25 µg de extracto

Figure 3E

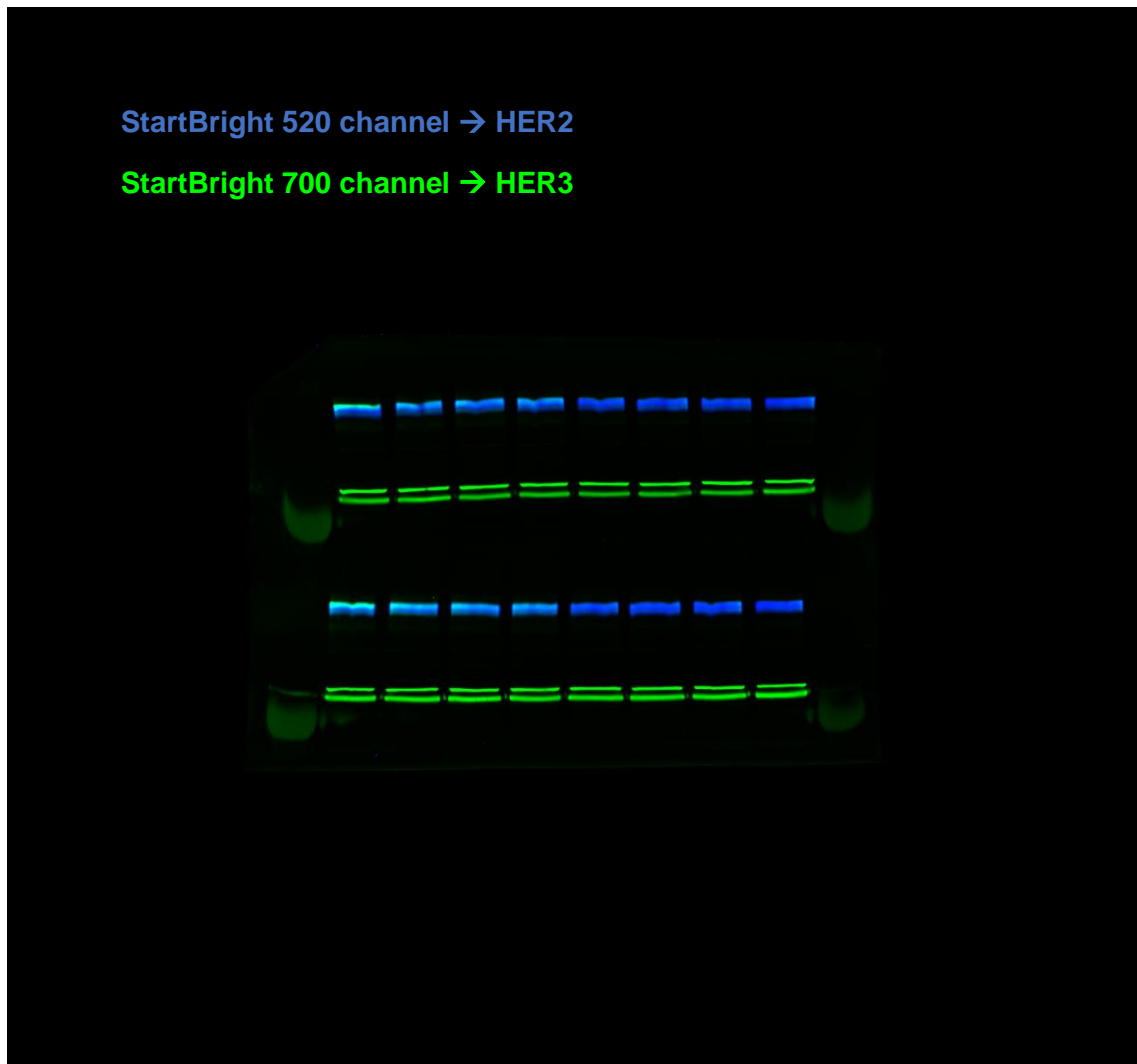

StartBright 520 channel → HER2

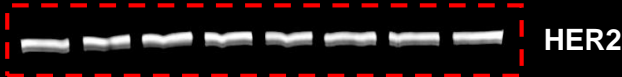

BT474

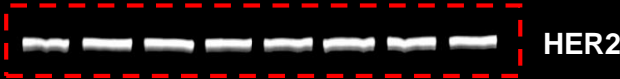

BTRH

StartBright 700 channel → HER3

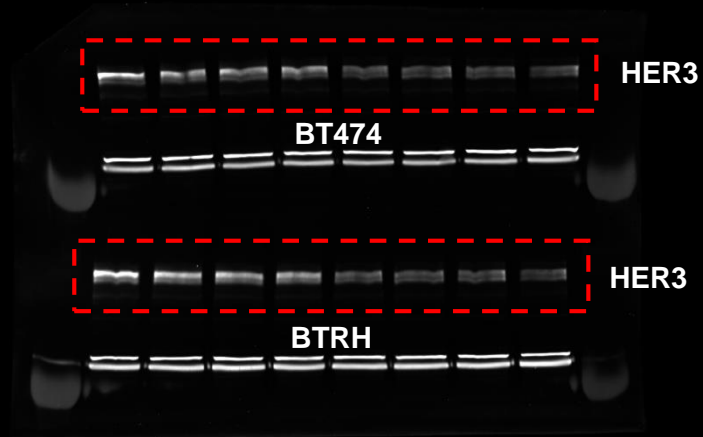

H2 BT

H3 BT

5/15/19

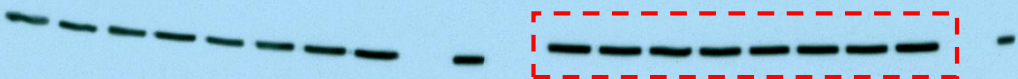

BT474

Calnexin

H2 RH

H3 RH

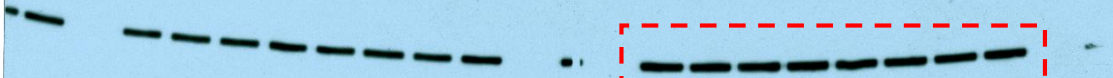

BTRH

Calnexin

Calnexin

(de los genes indicados arriba)
