# Supplementary material for: HER3 targeting with an antibody‐drug conjugate bypasses resistance to anti‐HER2 therapies
Source: PubMed Central journal article supplement (PMC7207167; doi:10.15252/emmm.201911498), 2020-04-24

Figure EV2A

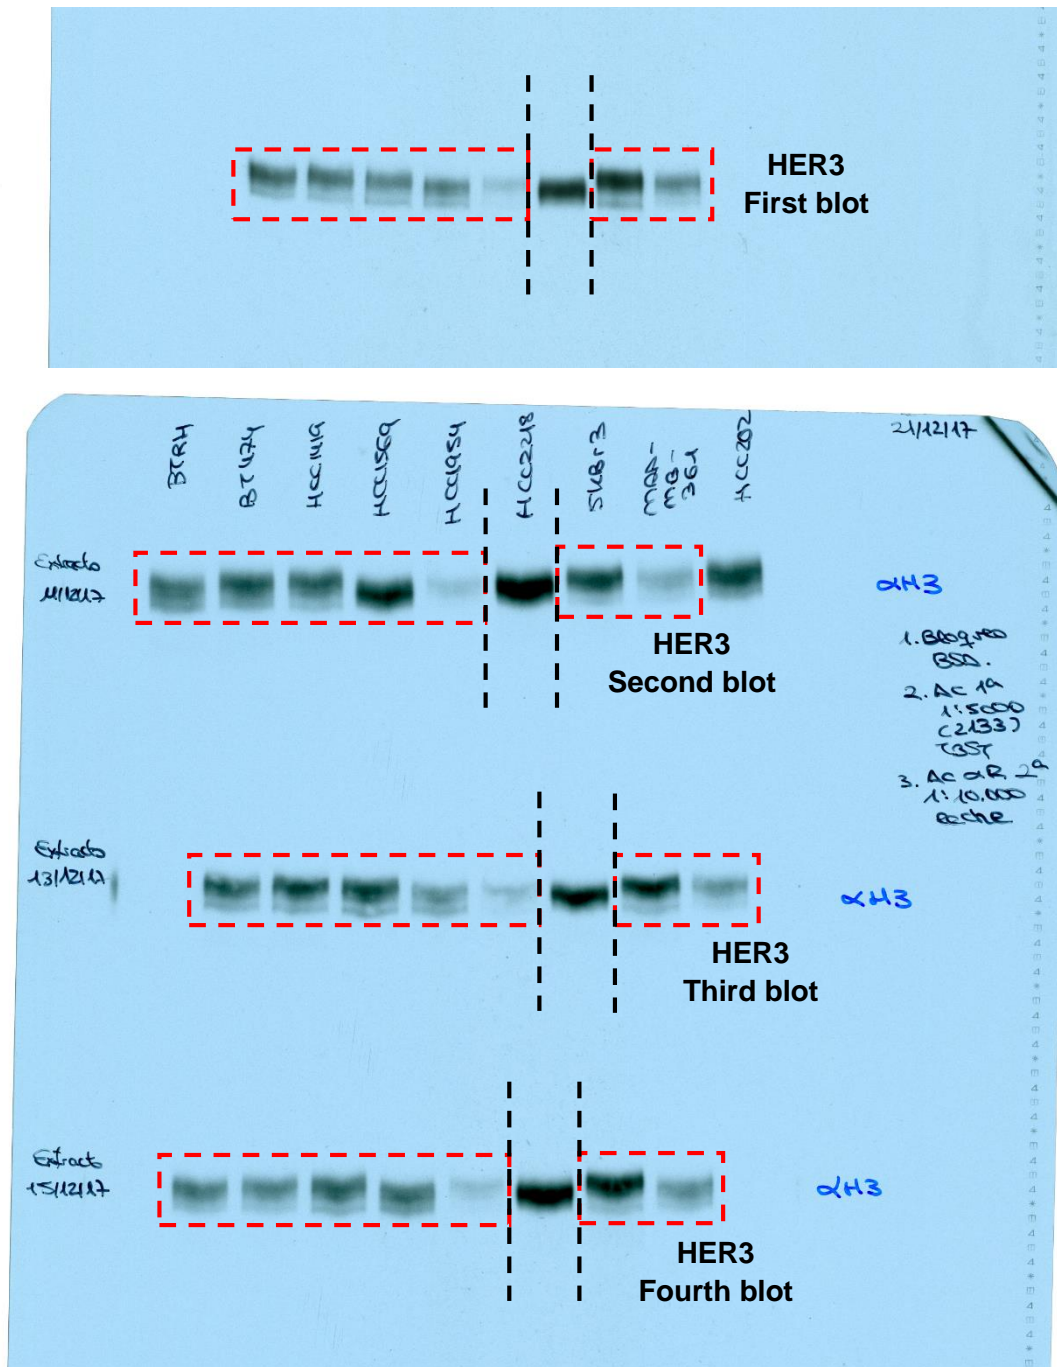

Figure EV2D

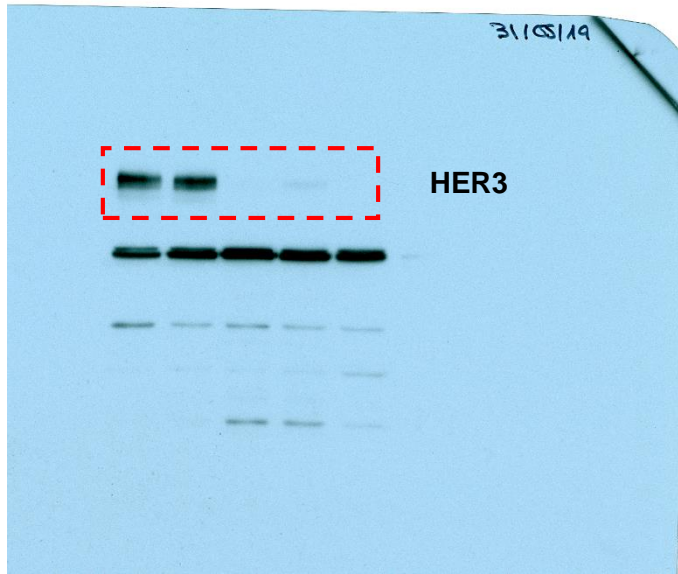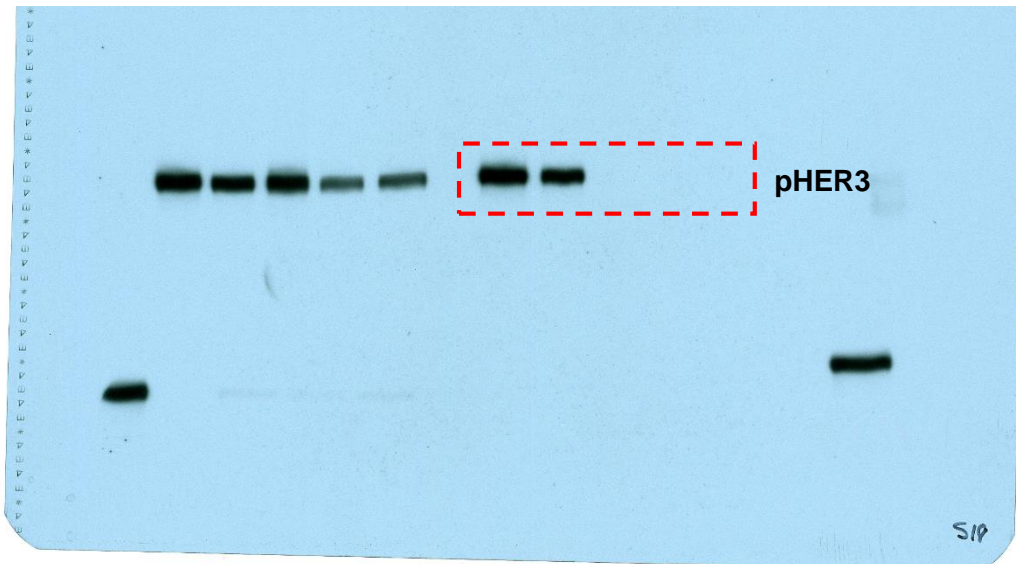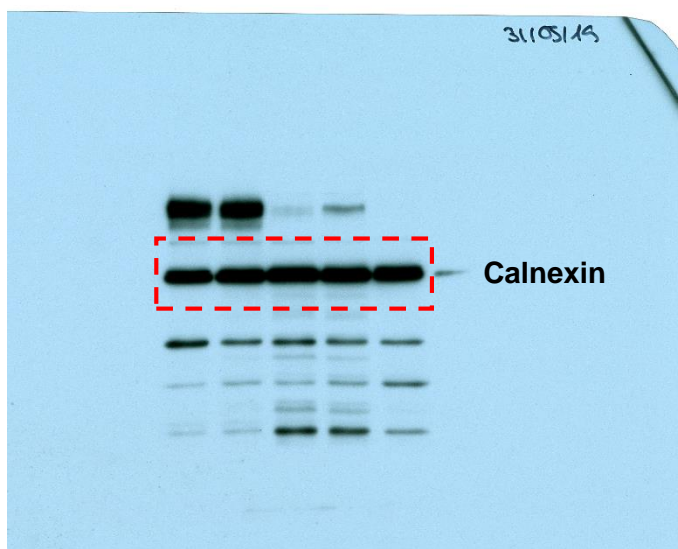

Figure EV2E

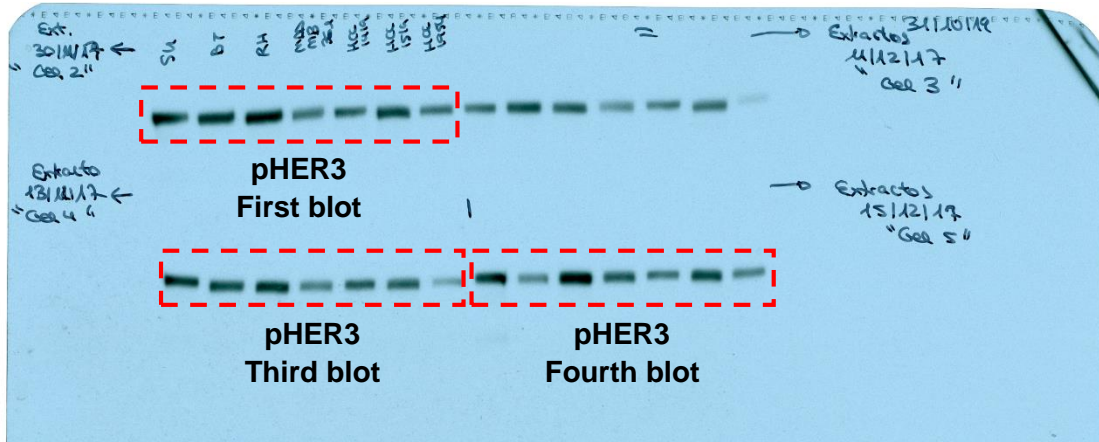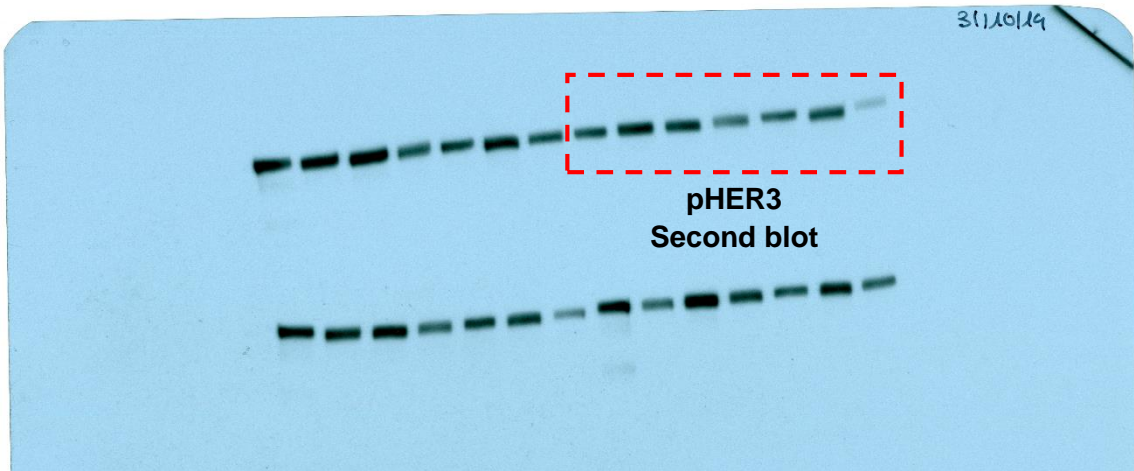

Supplement: EMMM-12-e11498-s007.pdf [file EMMM-12-e11498-s007.pdf]
